# Supplementary material
Source: Elsevier journal article supplement (https://univ-rennes.hal.science/hal-01468025v1/file/mmc3.zip)
Supplement: mmc3 [file mmc3.zip]

Archive with 1 entries (1 files):
- CIF-Ru.cif
