# Supplementary material
Source: Elsevier journal article supplement (https://univ-rennes.hal.science/hal-01468025v1/file/mmc3.zip)
Supplement: mmc3 [file mmc3.zip › CIF-Ru.cif]

#######################################################################
#
#                 Cambridge Crystallographic Data Centre
#                                CCDC 
#
#######################################################################
#
# If this CIF has been generated from an entry in the Cambridge 
# Structural Database, then it will include bibliographic, chemical, 
# crystal, experimental, refinement or atomic coordinate data resulting 
# from the CCDC's data processing and validation procedures.
#
#######################################################################

data_prueba_3_sq
_symmetry_cell_setting           triclinic
_symmetry_space_group_name_H-M   'P -1'
_symmetry_Int_Tables_number      2
_space_group_name_Hall           '-P 1'
loop_
_symmetry_equiv_pos_site_id
_symmetry_equiv_pos_as_xyz
1 x,y,z
2 -x,-y,-z
_cell_length_a                   12.058(2)
_cell_length_b                   14.584(3)
_cell_length_c                   17.487(3)
_cell_angle_alpha                74.21(3)
_cell_angle_beta                 71.28(2)
_cell_angle_gamma                72.92(2)
_cell_volume                     2729.77
loop_
_atom_site_label
_atom_site_type_symbol
_atom_site_fract_x
_atom_site_fract_y
_atom_site_fract_z
Ru1 Ru 0.12448(4) 0.57125(3) 0.79551(3)
Ru2 Ru -0.00666(4) 0.58703(4) 0.66227(3)
Ru4 Ru 0.02189(4) 0.77738(4) 0.69848(3)
Ru3 Ru -0.09107(5) 0.78216(4) 0.57156(3)
P1 P 0.07874(13) 0.45000(11) 0.74895(9)
P2 P 0.12743(14) 0.73292(11) 0.79924(9)
C1 C 0.2041(5) 0.3539(4) 0.7118(3)
C2 C 0.1681(5) 0.2671(4) 0.7339(4)
C3 C 0.2526(7) 0.1708(5) 0.7202(5)
H3A H 0.2996 0.1483 0.7603
H3B H 0.3077 0.1798 0.6659
C4 C 0.1861(8) 0.0934(5) 0.7277(5)
H4A H 0.1600 0.1056 0.6781
H4B H 0.2409 0.0296 0.7321
C5 C 0.0787(8) 0.0924(5) 0.8011(5)
H5A H 0.1039 0.0814 0.8509
H5B H 0.0423 0.0394 0.8055
C6 C -0.0125(6) 0.1887(5) 0.7928(4)
H6A H -0.0460 0.1946 0.7476
H6B H -0.0776 0.1890 0.8428
C7 C 0.0398(6) 0.2747(4) 0.7775(4)
C8 C -0.0189(5) 0.3630(4) 0.7979(3)
C9 C 0.3282(5) 0.3604(4) 0.6736(3)
C10 C 0.3892(5) 0.3740(4) 0.5893(3)
H10 H 0.3543 0.3825 0.5469
C11 C 0.5120(6) 0.3732(6) 0.5781(5)
H11 H 0.5652 0.3823 0.5261
C12 C 0.5457(6) 0.3585(6) 0.6464(5)
H12 H 0.6227 0.3564 0.6483
S1 S 0.42650(17) 0.34406(16) 0.73083(12)
C13 C -0.1468(5) 0.3863(4) 0.8417(3)
C14 C -0.1996(5) 0.4052(4) 0.9237(3)
H14 H -0.1578 0.4069 0.9595
C15 C -0.3262(7) 0.4207(6) 0.9409(6)
H15 H -0.3769 0.4364 0.9906
C16 C -0.3690(7) 0.4116(6) 0.8824(6)
H16 H -0.4499 0.4181 0.8872
S2 S -0.2559(2) 0.38657(18) 0.79849(15)
C17 C 0.0671(6) 0.7840(4) 0.8928(3)
C18 C 0.1553(6) 0.8116(4) 0.9066(4)
C19 C 0.1348(7) 0.8633(5) 0.9768(4)
H19A H 0.0935 0.9310 0.9628
H19B H 0.0837 0.8324 1.0263
C20 C 0.2517(8) 0.8596(7) 0.9933(5)
H20A H 0.2363 0.9048 1.0292
H20B H 0.2805 0.7943 1.0225
C21 C 0.3452(8) 0.8834(7) 0.9203(5)
H21A H 0.4156 0.8817 0.9365
H21B H 0.3179 0.9495 0.8921
C22 C 0.3807(7) 0.8137(6) 0.8605(5)
H22A H 0.4272 0.8424 0.8075
H22B H 0.4312 0.7527 0.8813
C23 C 0.2718(6) 0.7925(5) 0.8492(4)
C24 C 0.2740(5) 0.7540(5) 0.7859(3)
C25 C 0.3846(5) 0.7242(5) 0.7232(4)
C26 C 0.4213(6) 0.7736(5) 0.6411(4)
H26 H 0.3789 0.8330 0.6174
C27 C 0.5337(7) 0.7184(7) 0.6000(5)
H27 H 0.5718 0.7378 0.5449
C28 C 0.5799(7) 0.6359(7) 0.6481(5)
H28 H 0.6525 0.5931 0.6301
S3 S 0.48823(18) 0.61942(17) 0.74660(13)
C29A C -0.0565(13) 0.8002(12) 0.9446(10)
C30A C -0.1038(16) 0.7329(13) 1.0165(11)
H30A H -0.0660 0.6703 1.0384
C31A C -0.2266(13) 0.7877(10) 1.0464(9)
H31A H -0.2786 0.7604 1.0934
C32A C -0.2633(11) 0.8787(10) 1.0047(7)
H32A H -0.3404 0.9178 1.0184
S4A S -0.1491(5) 0.9124(3) 0.9234(3)
C35 C 0.2622(5) 0.5743(4) 0.6992(4)
O1 O -0.1048(5) 0.5732(5) 0.9388(3)
C33 C -0.0201(7) 0.5745(5) 0.8855(4)
O2 O 0.2897(5) 0.4607(4) 0.9056(3)
C34 C 0.2255(6) 0.5015(5) 0.8651(4)
O3 O 0.3400(4) 0.5771(3) 0.6416(2)
C36 C -0.1602(6) 0.6064(5) 0.7452(4)
O4 O -0.2505(4) 0.6143(4) 0.7933(3)
C37 C -0.0625(6) 0.5170(6) 0.6138(4)
O5 O -0.0972(6) 0.4706(5) 0.5872(3)
C38 C 0.1360(6) 0.5828(5) 0.5720(4)
O6 O 0.2189(4) 0.5738(4) 0.5172(3)
C39 C -0.2425(7) 0.7953(5) 0.6562(4)
O7 O -0.3363(5) 0.8112(4) 0.6982(3)
C40 C -0.1522(7) 0.7307(6) 0.5090(4)
O8 O -0.1877(6) 0.7017(6) 0.4688(3)
C41 C 0.0566(7) 0.7737(6) 0.4832(5)
O9 O -0.1474(7) 1.0041(5) 0.5145(5)
C42 C -0.1258(8) 0.9221(6) 0.5371(5)
O10 O 0.1328(5) 0.7734(5) 0.4250(3)
C43 C -0.1318(7) 0.7798(5) 0.7809(4)
O11 O -0.2212(5) 0.7846(5) 0.8300(3)
C44 C -0.0046(7) 0.9132(6) 0.6817(4)
O12 O -0.0206(6) 0.9965(4) 0.6720(4)
C45 C 0.1612(7) 0.7745(5) 0.6044(4)
O13 O 0.2441(4) 0.7777(4) 0.5500(3)
C29B C -0.064(2) 0.8100(19) 0.9373(14)
C30B C -0.151(2) 0.8951(17) 0.9132(14)
H30B H -0.1388 0.9423 0.8652
C31B C -0.261(2) 0.8939(16) 0.9762(12)
H31B H -0.3305 0.9420 0.9728
C32B C -0.2571(16) 0.8179(16) 1.0416(14)
H32B H -0.3222 0.8093 1.0870
S4B S -0.1164(8) 0.7394(6) 1.0300(7)

#END
